# Supplementary material
Source: PubMed Central journal article supplement (PMC4836354)
Supplement: JVI.02908-15_zjv999091613so3.pdf [file JVI.02908-15_zjv999091613so3.pdf]

## **Supplemental movie legends.**

**Movie S1.** Live cell imaging video of cluster dynamics in GFP-LC3 neurons treated with IFN $\beta$ . GFP-LC3 neurons were plated on glass-bottomed dishes, and four days later were treated with 12.5 u/ml IFN $\beta$ . The video was acquired 12 hours after treatment and shows a single neuron in which a representative cluster exhibits continuous dynamic motion without loss of integrity or recruitment of new vesicles from the cytoplasm. The movie consists of 61 frames, one frame per 2 minutes, representing ~2 hours of real time. Images were acquired in a Z-stack consisting of 20 sections, 1 $\mu$ m per section. Cultures were imaged in phenol red-free NB-A complete medium on an Olympus IX83 TIRF-4 microscope equipped with a controlled environment stage.

**Movie S2.** Live cell imaging video of cluster dynamics in GFP-LC3 neurons treated with IFN $\beta$  and bafilomycin. GFP-LC3 neurons were plated on glass-bottomed dishes, and four days later were treated with 12.5 u/ml IFN $\beta$  for 12 hours, then treated with 100nM bafilomycin and imaged for 4 hours. The video shows a single neuron in which a representative cluster exhibits loss of stability. Smaller GFP+ vesicles migrate proximally without aggregation with the cluster. The movie consists of 17 frames, one frame per 15 minutes, representing ~4 hours of real time. Images were acquired in a Z-stack consisting of 20 sections, 1 $\mu$ m per section. Cultures were imaged in phenol red-free NB-A complete medium on an Olympus IX83 TIRF-4 microscope equipped with a controlled environment stage.
